# Supplementary material
Source: Elsevier journal article supplement (https://www.sciencedirect.com/science/article/pii/S2173573518300516)
Supplement: mmc1 [file S2173573518300516:mmc1.docx]

AUTORES

José Luis Pardal-Refoyo1, 2

Pablo Parente-Arias1, 3

Marta María Arroyo-Domingo1, 4

Juan Manuel Maza-Solano1, 5

José Granell-Navarro1, 6

Jesús María Martínez-Salazar7

Ramón Moreno-Luna1, 5

Elvylins Vargas-Yglesias1, 8

1 Comisión de Cabeza y Cuello y Base de Cráneo (SEORL CCC)

2SACYL. Complejo Asistencial de Zamora.

3Complexo Hospitalario Universitario de A Coruña.

4Hospital de Torrevieja. Alicante

5Hospital Universitario Virgen Macarena. Sevilla.

6Hospital Universitario Rey Juan Carlos. Móstoles. Madrid.

7Hospital Universitario del Sureste. Arganda del Rey. Madrid

8Hospital Universitario de Móstoles. Madrid

DIRECCIÓN DE CONTACTO

José Luis Pardal-Refoyo

C/ Miguel de Unamuno Nº 2-Bajo

49029 ZAMORA

Correo electrónico: jlpardal@usal.es

Conflicto de intereses: no hay conflicto de intereses

Número de palabras del manuscrito: 4940
